# Supplementary material for: Modulation of Endoplasmic Reticulum Stress Controls CD4+ T-cell Activation and Antitumor Function
Source: Oxford University Press journal article supplement (doi:10.1158/2326-6066.cir-17-0081), 2017-06-22
Supplement: 23266066cir170081-sup-178787_2_supp_4096568_vrgqh8.docx [file 23266066cir170081-sup-178787_2_supp_4096568_vrgqh8.docx]

Supplementary Table 1

|  | **CD4** | | | **CD8** | | |
| --- | --- | --- | --- | --- | --- | --- |
|  | **WT** | **96KO** | ***P* value** | **WT** | **96KO** | ***P* value** |
| **Spleen** | | | | | | |
| # cells | 6.7 x 106 | 2.2 x 107 | <0.0001 | 4.8 x 106 | 4.8 x 106 | ns |
| % cells | 15.4% | 28.2% | <0.01 | 10.6% | 6.1% | <0.001 |
| **Mesenteric lymph nodes** | | | | | | |
|  |  |  |  |  |  |  |
| % cells | 33.2% | 7.4% | <0.0001 | 24.1% | 5.3% | <0.0001 |
